# Supplementary material for: Cadmium exposure and sulfate limitation reveal differences in the transcriptional control of three sulfate transporter (Sultr1;2) genes in Brassica juncea
Source: PubMed Central journal article supplement (PMC4049391; doi:10.1186/1471-2229-14-132), 2014-05-16

**Additional file 7 Growth analysis of CP154-7A yeast mutant expressing an high- or a low-affinity sulfate transporter of *Zea mays* (ZmST1;1) or *Arabidopsis thaliana* (AtSultr2;1), respectively.** *ZmST1;1* and *AtSultr2;1* coding sequences were amplified by RT-PCR from total RNA isolated from maize and *Arabidopsis* roots, respectively, and cloned in the pESC-TRP vector as described in Methods. (A) Complemented yeast cells were incubated in liquid media containing two sulfate concentrations (0.1 or 0.5 mM) as sole sulfur source. Yeast growth was monitored by measuring the  $A_{600}$  nm at different times. The growth rates (expressed as reciprocals of the duplication times,  $dt^{-1}$ ) of the yeast cells expressing the high-affinity sulfate transporter ZmST1;1 were  $0.102 \pm 0.002$  h<sup>-1</sup> and  $0.103 \pm 0.002$  h<sup>-1</sup> at 0.1 (●) and 0.5 (○) mM sulfate external concentration, respectively. In the same media yeast cells expressing the low-affinity sulfate transporter AtSultr2;1 showed growth rates significantly lower, which increased from  $0.021 \pm 0.006$  h<sup>-1</sup> to  $0.063 \pm 0.001$  h<sup>-1</sup> moving the external sulfate concentration from 0.1 (▼) to 0.5 (▽) mM. (B) Growth curves of yeast cells expressing ZmST1;1 (● 0 μM; ○ 1 μM; ▼ 2.5 μM; △ 5 μM; ■ 7.5 μM; □ 10 μM; ◆ 25 μM; ◇ 50 μM; ▲ 100 μM). (C) Growth curves of yeast cells expressing AtSultr2;1 (● 0 μM; ○ 0.05 mM; ▼ 0.1 mM; △ 0.15 mM; ■ 0.2 mM; □ 0.25 mM; ◆ 0.5 mM; ◇ 1 mM; ▲ 1.5 mM; ▽ 2 mM; ● 2.5 mM; ◐ 3 mM). (D, E) Estimation of the growth constant ( $k_G$ ) for sulfate. The duplication times ( $dt$ ) of the complemented yeast cells were calculated by fitting the equation  $A_{600}(t) = A_{600}(t_0) e^{kt}$  to the experimental data reported in B and C.  $k_G$  was determined by expressing the growth rates ( $dt^{-1}$ ) of complemented yeasts as a function of sulfate concentrations in the media, and by fitting the Michaelis-Menten equation to the data. Results reveal that the  $k_G$  values for sulfate were similar to the  $k_M$  values measured for each sulfate transporters by using conventional methods (Nocito *et al. Plant Physiol*, 2006 **141**:1138-1148; Takahashi *et al. Plant J*, 2000 **23**:171-182). Data points and error bars are means and SE of two experiments performed in triplicate ( $n = 6$ ).

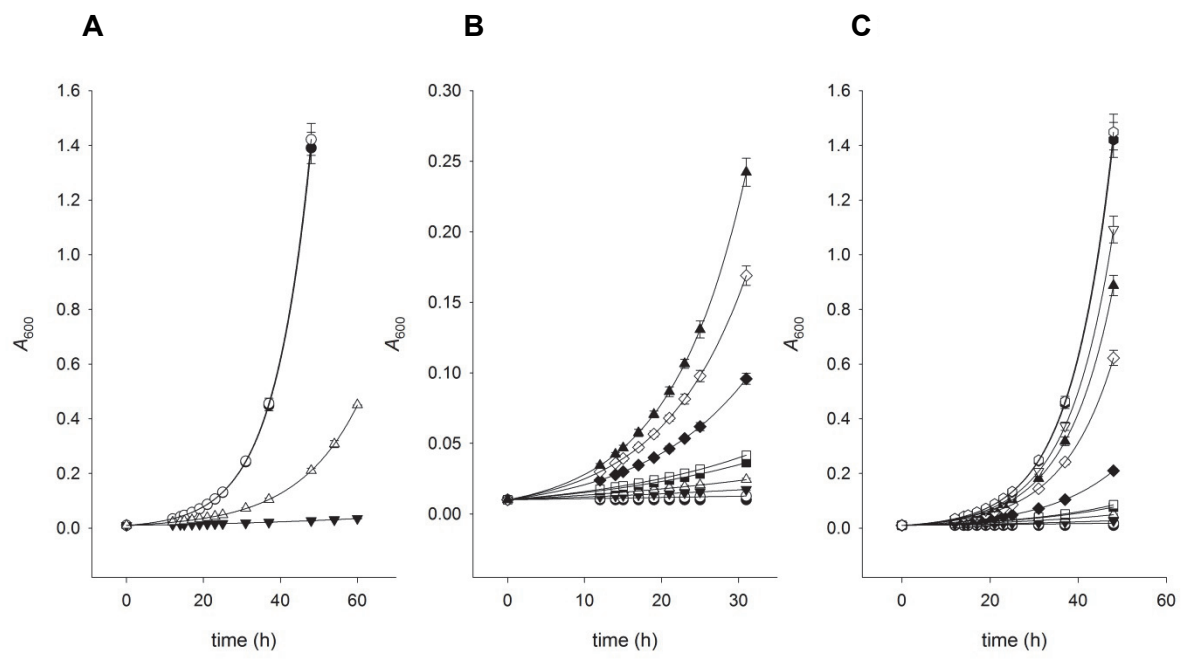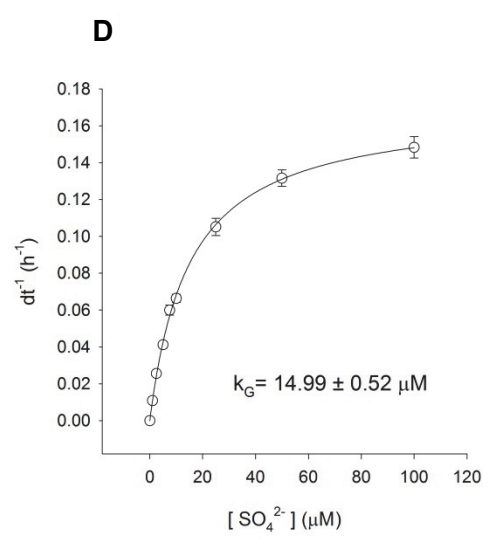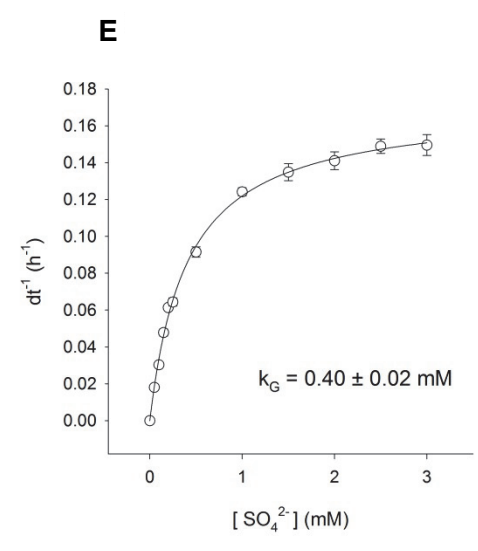

Supplement: 1471-2229-14-132-S7.pdf [file 1471-2229-14-132-S7.pdf]
