# Supplementary material for: Cadmium exposure and sulfate limitation reveal differences in the transcriptional control of three sulfate transporter (Sultr1;2) genes in Brassica juncea
Source: PubMed Central journal article supplement (PMC4049391; doi:10.1186/1471-2229-14-132), 2014-05-16

**Additional file 3 Dendrogram showing high affinity sulfate transporters of *Arabidopsis thaliana*, *Brassica juncea*, *Brassica napus*, and *Brassica rapa*.** The dendrogram was constructed on the bases of amino acid sequences using MEGA 5.05 software. Accession numbers for *A. thaliana* (TAIR; <http://www.arabidopsis.org/>) are: AtSultr1;1, At4g08620; AtSultr1;2, At1g78000. Accession numbers for *B. juncea* and *B. napus* (GenBank; <http://www.ncbi.nlm.nih.gov/genbank/>) are: BjSultr1;1, JX896426; BjSultr1;2a, JX896427; BjSultr1;2b, JX896428; BjSultr1;2c, JX896429; BnSultr1;1, AJ416460; BnSultr1;2, AJ311388. Accession numbers for *B. rapa* (BRAD; <http://brassicadb.org/brad/>) are: Bra022623; Bra015641; Bra008340.

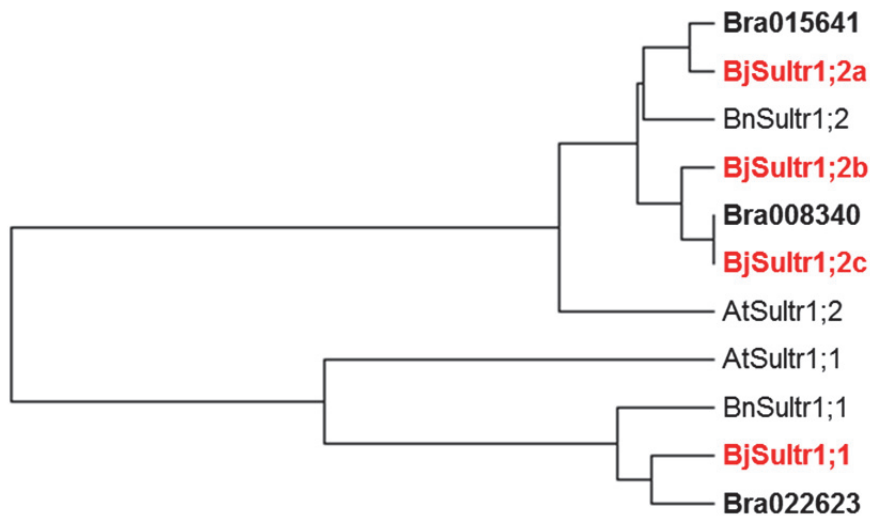

Supplement: 1471-2229-14-132-S3.pdf [file 1471-2229-14-132-S3.pdf]
