# Supplementary material for: Cadmium exposure and sulfate limitation reveal differences in the transcriptional control of three sulfate transporter (Sultr1;2) genes in Brassica juncea
Source: PubMed Central journal article supplement (PMC4049391; doi:10.1186/1471-2229-14-132), 2014-05-16

**Additional file 5 Growth curves of complemented yeast cells.** (A, B, C, D) Complemented yeasts were incubated at 28°C for 25 h in liquid media containing different sulfate concentrations (● 0 μM; ○ 1 μM; ▼ 2.5 μM; △ 5 μM; ■ 7.5 μM; □ 10 μM; ◆ 25 μM; ◇ 50 μM; ▲ 100 μM) or 100 μM HCys (▽) as sole sulfur source. Absorbance was measured at 600 nm ( $A_{600}$ ) along time. Data points and error bars are means and SE of two experiments performed in triplicate ( $n = 6$ ).

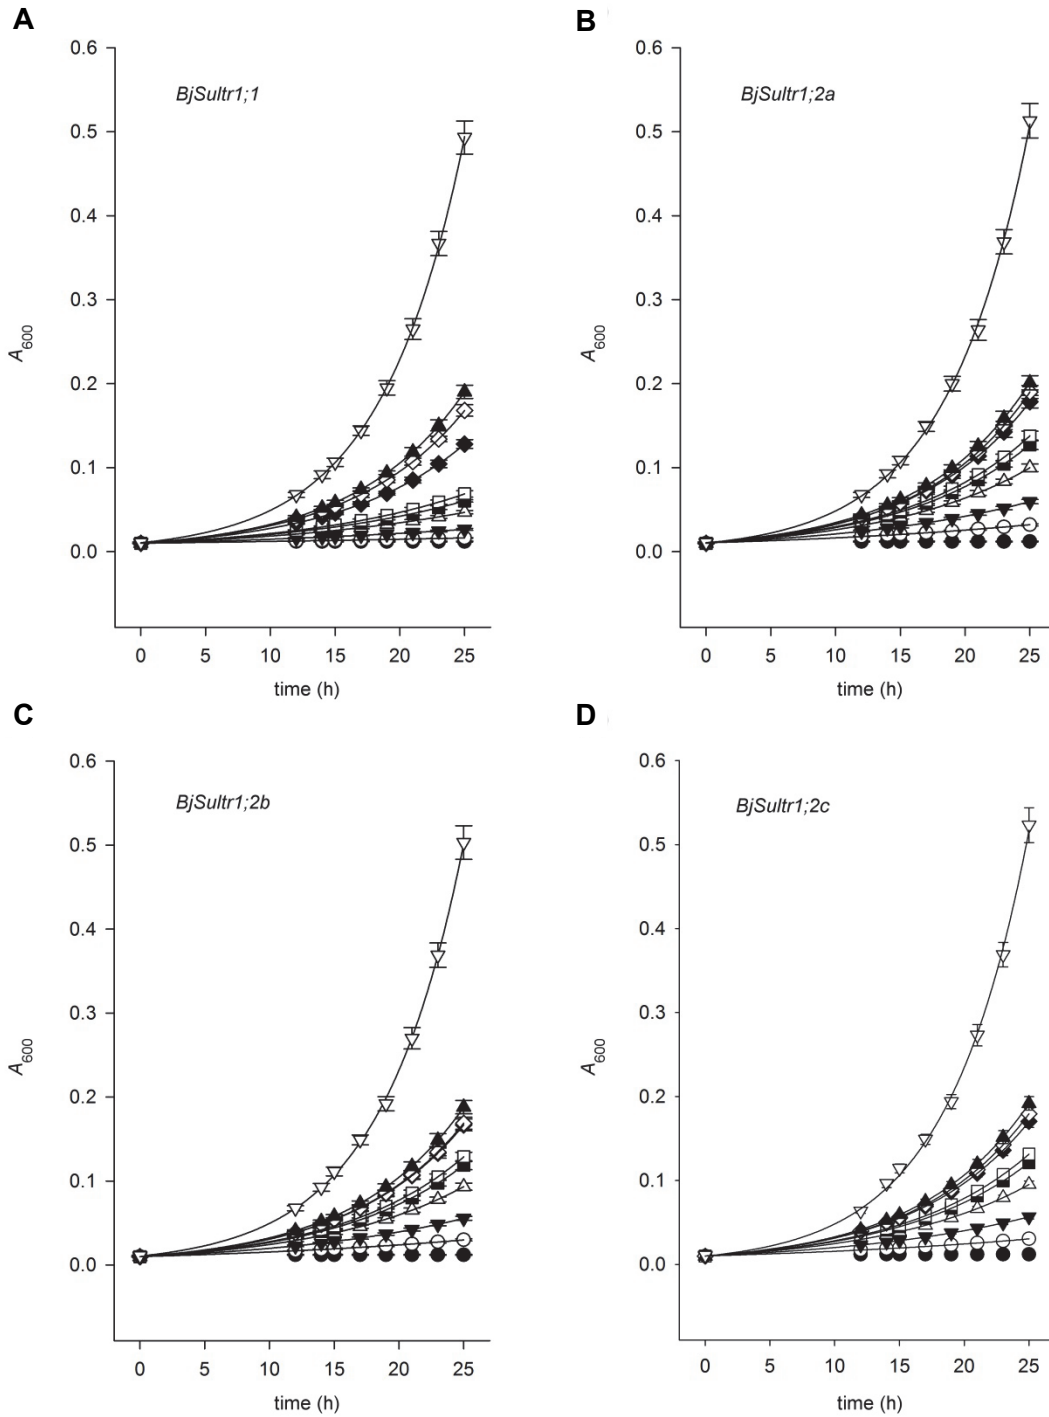

Supplement: 1471-2229-14-132-S5.pdf [file 1471-2229-14-132-S5.pdf]
