# Supplementary material for: Cadmium exposure and sulfate limitation reveal differences in the transcriptional control of three sulfate transporter (Sultr1;2) genes in Brassica juncea
Source: PubMed Central journal article supplement (PMC4049391; doi:10.1186/1471-2229-14-132), 2014-05-16
Supplement: 1471-2229-14-132-S8.pdf [file 1471-2229-14-132-S8.pdf]

Additional file 8 Alignment of nucleotide sequences of the three *BjSultr1;2* forms. Shared nucleotides are highlighted in grey.

|                     |     |       |                     |               |                                  |          |                                                          |                                                               |                                                                    |               |              |           |       |      |          |            |        |                                     |       |                  |            |      |    |        |
|---------------------|-----|-------|---------------------|---------------|----------------------------------|----------|----------------------------------------------------------|---------------------------------------------------------------|--------------------------------------------------------------------|---------------|--------------|-----------|-------|------|----------|------------|--------|-------------------------------------|-------|------------------|------------|------|----|--------|
| <i>BjSultr1; 2a</i> | 1   | ATGTC | TGGGAGAGCTCATCC     | TGTGGACGCTGAT | TAAGTCCAGCAACGGACGGTGGAGAT       | CTCCGAT  | CAAAATCGTGCCTCACCCGCCATAAAAGTTGGGG                       |                                                               |                                                                    |               |              |           |       |      |          |            |        |                                     |       |                  |            |      |    |        |
| <i>BjSultr1; 2b</i> | 1   | ATGTC | TGGGAGAGCTCATCC     | TG-----       | ATGTAAATCCGGTGACGGATGGTGGAGAT    | CTTCT    | TATCAAAATCGTGCCTCACCCGGCATAAAAGTTGGGG                    |                                                               |                                                                    |               |              |           |       |      |          |            |        |                                     |       |                  |            |      |    |        |
| <i>BjSultr1; 2c</i> | 1   | ATGTC | TGGGAGAGCTCATCC     | TG-----       | ATGTGAAATCCCTGTGTACGGATGGTGGAGAT | CTTCCGAT | CAAAATCGTGCCTCACCCGGCATAAAAGTTGGGTG                      |                                                               |                                                                    |               |              |           |       |      |          |            |        |                                     |       |                  |            |      |    |        |
| <i>BjSultr1; 2a</i> | 101 | TCC   | CACCGAAGCAGAAACATG  | TTCATGAC      | TTCATGTACACGTTCAAAGAAACTTT       | CTTCC    | CATGATGATCCCTCTCAGAGATTTTAAAGATCAGCCTAAAGTC              |                                                               |                                                                    |               |              |           |       |      |          |            |        |                                     |       |                  |            |      |    |        |
| <i>BjSultr1; 2b</i> | 92  | TCC   | CACCGAAGCAGAAACATG  | TTCATGAC      | TTCATGTACACGTTCAAAGAAACTTT       | CTTCC    | CATGATGATCCCTCTCAGACATTTTAAAGATCAGCCTAAAGTC              |                                                               |                                                                    |               |              |           |       |      |          |            |        |                                     |       |                  |            |      |    |        |
| <i>BjSultr1; 2c</i> | 92  | TCC   | CACCGAAGCAGAAACATG  | TTCATGAC      | TTCATGTACACGTTCAAAGAAAGCTTT      | CTTCC    | CATGATGATCCCTCTCAGACACTTAAAGATCAGCCTAAAGTC               |                                                               |                                                                    |               |              |           |       |      |          |            |        |                                     |       |                  |            |      |    |        |
| <i>BjSultr1; 2a</i> | 201 | CAAA  | CAGTTCAATGCTCCAGT   | CTGTCT        | CCCGTTTTCGAT                     | TGGGAC   | GTAGCTACAACTCAAGAAGTTTCGTGGTGATCTAAATTCGCCGGTTTA         |                                                               |                                                                    |               |              |           |       |      |          |            |        |                                     |       |                  |            |      |    |        |
| <i>BjSultr1; 2b</i> | 192 | CAAAA | AGTTCAATGCTCCAGT    | CTGTCT        | CCCGTTTTCGAT                     | TGGGAC   | GTAGCTACAACTCAAGAAGTTTCGTGGTGATCTAAATTCGCCGGTTTA         |                                                               |                                                                    |               |              |           |       |      |          |            |        |                                     |       |                  |            |      |    |        |
| <i>BjSultr1; 2c</i> | 192 | TAA   | GAAAGTTCAATGCTCCAGT | CTGTCT        | CCCGTTTTCGAT                     | TGGGAC   | GTAGCTACAACTCAAGAAGTTTCGTGGTGATCTAAATTCGCCGGTTTA         |                                                               |                                                                    |               |              |           |       |      |          |            |        |                                     |       |                  |            |      |    |        |
| <i>BjSultr1; 2a</i> | 301 | ACT   | AT                  | TGCCAGTCT     | TGTAATCC                         | TCAGGAT  | ATTTGGATA                                                | CGCTAAGCTCGTAAATTTGGATCCTAAATACGGTTTATATTCGAGTTTGTACCTCCATTGG |                                                                    |               |              |           |       |      |          |            |        |                                     |       |                  |            |      |    |        |
| <i>BjSultr1; 2b</i> | 292 | ACT   | AT                  | TGCCAGTCT     | TGTAATCC                         | TCAGGAT  | ATTTGGATA                                                | CGCTAAGCTCGTAAATTTGGATCCTAAATACGGTTTATATTCGAGTTTGTACCTCCATTGG |                                                                    |               |              |           |       |      |          |            |        |                                     |       |                  |            |      |    |        |
| <i>BjSultr1; 2c</i> | 292 | ACT   | AT                  | TGCCAGTCT     | TGTAATCC                         | TCAGGAT  | ATTTGGATA                                                | CGCTAAGCTCGTAAATTTGGATCCTAAATACGGTTTATATTCGAGTTTGTACCTCCATTGG |                                                                    |               |              |           |       |      |          |            |        |                                     |       |                  |            |      |    |        |
| <i>BjSultr1; 2a</i> | 401 | TGT   | AT                  | GCA           | TGTA                             | TGGGAGT  | TCTAGGCA                                                 | TAGCAATAGGACCCGTGCGTGTGGTTTCTCTGTCTGCTAGGTA                   | CTCCTCAAGCTGAGGTCGACCCAGT                                          |               |              |           |       |      |          |            |        |                                     |       |                  |            |      |    |        |
| <i>BjSultr1; 2b</i> | 392 | TGT   | AT                  | GCA           | TGTA                             | TGGGAGT  | TCTAGGCA                                                 | TAGCAATAGGACCCGTGCGTGTGGTTTCTCTGTCTGCTAGGTA                   | CTCCTCAAGCTGAGGTCGACCCAGT                                          |               |              |           |       |      |          |            |        |                                     |       |                  |            |      |    |        |
| <i>BjSultr1; 2c</i> | 392 | TGT   | AT                  | GCA           | TGTA                             | TGGGAGT  | TCTAGGCA                                                 | TAGCAATAGGACCCGTGCGTGTGGTTTCTCTGTCTGCTAGGTA                   | CTCCTCAAGCTGAGGTCGACCCAGT                                          |               |              |           |       |      |          |            |        |                                     |       |                  |            |      |    |        |
| <i>BjSultr1; 2a</i> | 501 | CACA  | AAACCC              | TGAT          | GAGTAC                           | CTCCGAC  | TTTCCCTT                                                 | CACCGCCAGT                                                    | TTTTCGCCGGTGTCACTGAAGCAGCCCTTGGATTTCTTAGGTTAGGTTCTTTGATT           |               |              |           |       |      |          |            |        |                                     |       |                  |            |      |    |        |
| <i>BjSultr1; 2b</i> | 492 | CACA  | AAACCC              | TGAT          | GAGTAC                           | CTCCGAC  | TTTCCCTT                                                 | CACCGCCAGT                                                    | TTTTCGCCGGTGTCACTGAAGCAGCCCTTGGATTTCTTAGGTTAGGTTCTTTGATT           |               |              |           |       |      |          |            |        |                                     |       |                  |            |      |    |        |
| <i>BjSultr1; 2c</i> | 492 | CACA  | AAACCC              | TGAT          | GAGTAC                           | CTCCGAC  | TTTTCGCCGGTGTCACTGAAGCAGCCCTTGGATTTCTTAGGTTAGGTTCTTTGATT |                                                               |                                                                    |               |              |           |       |      |          |            |        |                                     |       |                  |            |      |    |        |
| <i>BjSultr1; 2a</i> | 601 | GAT   | TTCC                | TTT           | CACAC                            | GGGCT    | GTGTGGAT                                                 | TTTCAT                                                        | GGGTGGTGCAGCCATCACAAATAGCTCTTCAAGCTCAAAAGGGTTTCTTAGGATCAAAAAATTTCA |               |              |           |       |      |          |            |        |                                     |       |                  |            |      |    |        |
| <i>BjSultr1; 2b</i> | 592 | GAT   | TTCC                | TTT           | CACAC                            | GGGCT    | GTGTGGAT                                                 | TTTCAT                                                        | GGGTGGTGCAGCCATCACAAATAGCTCTTCAAGCTCAAAAGGGTTTCTTAGGATCAAAAAATTTCA |               |              |           |       |      |          |            |        |                                     |       |                  |            |      |    |        |
| <i>BjSultr1; 2c</i> | 592 | GAT   | TTCC                | TTT           | CACAC                            | GGGCT    | GTGTGGAT                                                 | TTTCAT                                                        | GGGTGGTGCAGCCATCACAAATAGCTCTTCAAGCTCAAAAGGGTTTCTTAGGATCAAAAAATTTCA |               |              |           |       |      |          |            |        |                                     |       |                  |            |      |    |        |
| <i>BjSultr1; 2a</i> | 701 | CCA   | AGAAA               | AC            | CGAT                             | AT       | CA                                                       | TTGCT                                                         | TTTTAGATTTCTGTCTT                                                  | CAGCGCAGCTCAT | CATGGTTGGAAT | TGGCAGACT | TATAC | TCAT | TGGTGCAT | CTTCTTTGAC |        |                                     |       |                  |            |      |    |        |
| <i>BjSultr1; 2b</i> | 692 | CCA   | AGAAA               | AC            | CGAT                             | AT       | CA                                                       | TTGCT                                                         | TTTTAGATTTCTGTCTT                                                  | CAGCGCAGCTCAT | CATGGTTGGAAT | TGGCAGACT | TATAC | TCAT | TGGTGCAT | CTTCTTTGAC |        |                                     |       |                  |            |      |    |        |
| <i>BjSultr1; 2c</i> | 692 | CCA   | AGAAA               | AC            | CGAT                             | AT       | CA                                                       | TTGCT                                                         | TTTTAGATTTCTGTCTT                                                  | CAGCGCAGCTCAT | CATGGTTGGAAT | TGGCAGACT | TATAC | TCAT | TGGTGCAT | CTTCTTTGAC |        |                                     |       |                  |            |      |    |        |
| <i>BjSultr1; 2a</i> | 801 | CTT   | CC                  | TTCT          | CACT                             | CT       | TAAA                                                     | CT                                                            | AT                                                                 | TGGGAAAAGAA   | CAAGAAA      | CTGTT     | CC    | GGG  | TTCC     | GGG        | TTGCAC | CCGTTGATATCAGTTATCAATTTCCACCTTCTTT  |       |                  |            |      |    |        |
| <i>BjSultr1; 2b</i> | 792 | CTT   | CC                  | TTCT          | CACT                             | CT       | TAAA                                                     | CT                                                            | AT                                                                 | TGGGAAAAGAA   | CAAGAAA      | CTGTT     | CC    | GGG  | TTCC     | GGG        | TTGCAC | CCGTTGATATCAGTTATCAATTTCCACCTTCTTT  |       |                  |            |      |    |        |
| <i>BjSultr1; 2c</i> | 792 | ATT   | CC                  | TTCT          | CACT                             | CT       | TAAA                                                     | CT                                                            | AT                                                                 | TGGGAAAAGAA   | CAAGAAA      | CTGTT     | CC    | GGG  | TTCC     | GGG        | TTGCAC | CCGTTGATATCAGTTATCAATTTCCACATTTCTTT |       |                  |            |      |    |        |
| <i>BjSultr1; 2a</i> | 901 | GTC   | TAC                 | ATA           | TAA                              | CCCG     | GAG                                                      | CCAA                                                          | AAAC                                                               | AAGG          | AT           | CTT       | GA    | AAA  | CA       | AT         | CTT    | TCT                                 | CTTTT | TTGATCAAAATTTTGA | TCAAAATTTT | TACT | CT | CCGGAG |
| <i>BjSultr1; 2b</i> | 892 | GTT   | TAC                 | ATA           | TAA                              | CCCG     | GAG                                                      | CCAA                                                          | AAAC                                                               | AAGG          | AT           | CTT       | GA    | AAA  | CA       | AT         | CTT    | TCT                                 | CTTTT | TTGATCAAAATTTTGA | TCAAAATTTT | TACT | CT | CCGGCC |
| <i>BjSultr1; 2c</i> | 892 | GTC   | TAC                 | ATA           | TAA                              | CCCG     | GAG                                                      | CCAA                                                          | AAAC                                                               | AAGG          | AT           | CTT       | GA    | AAA  | CA       | AT         | CTT    | TCT                                 | CTTTT | TTGATCAAAATTTTGA | TCAAAATTTT | TACT | CT | CCGGAC |

**BjSultr1; 2a** 1001 ATAACTTGGCAAAGGGGATTCCCATCGGTGTTGTCGGTGGAAATGGTCGCCCTAACAGAAAGCTGTAGCGAATGGAAAGAAACCTTTGCTGCAATGAAAGACTA  
**BjSultr1; 2b** 992 ATTACCTAGCTAAAGGGCATTCCCATCGGTAGTCCCTGGAAATGGTTGCCCTAACGGAACTGTGGCTATTGGAAAGAAACAATTTGCTGCAATGAAAGACTA  
**BjSultr1; 2c** 992 ATTACCTTGCFAAGGGCATTCCGTATCGGTGAGTCCCTGGAAATGGTCGCCCTAACGGAAAGCTGTGGCTATTGGAAAGAAACCTTTGCTGCAATGAAAGACTA  
  
**BjSultr1; 2a** 1101 TCAAAATCGACGGTAAACAAAGAGATGGTAGACTAGGTGTTAAGAACCTTGTGTTGGAACAATGTCCTTTCTTGTACTAGTGGCAGAGATCGTTCTCAAGATCA  
**BjSultr1; 2b** 1092 TCAAAATAGATGGTAAACAAAGAGATGGTAGACTAGGTGTTAAGAACCTTGTGTTGGAACAATGTCCTTTCTTGTACTAGTGGCAGAGATCGTTCTCAAGATCA  
**BjSultr1; 2c** 1092 TCAAAATCGATGGTAAACAAAGAGATGGTAGACTAGGTGTTAAGAACCTTGTGTTGGAACAATGTCCTTTCTTGTACTAGTGGCAGAGATCGTTCTCAAGATCA  
  
**BjSultr1; 2a** 1201 GCTGTAAACTTCATGGCTGGATGTCAAAACHTGGTGTTCACCAACATCAATAATGTCCTTTCTTGTGACACTGCTCTTCCCTCACTCCCTCTTTTCAAGT  
**BjSultr1; 2b** 1192 GCTGTAAACTTCATGGCTGGATGTCAAAACHTGGTGTTCACCAACATCAATAATGTCCTTTCTTGTGACACTGCTCTTCCCTCACTCCCTCACTTTTAAAGT  
**BjSultr1; 2c** 1192 GCTGTAAACTTCATGGCTGGATGTCAAAACHTGGTGTTCACCAACATCAATAATGTCCTTTCTTGTGACACTGCTCTTCCCTCACTCCCTCACTTTTAAAGT  
  
**BjSultr1; 2a** 1301 ACACACCAAAACGCCATCCITAGCAGCTATTATATCATCAACGCCAGTGAATCCCTGTGATGATVATCCAAAGCAGTATTTTGAATCTTCAAGGTCGATAAGCTCGA  
**BjSultr1; 2b** 1292 ACACACCAAAACGCCAATCCITCGCAGCTATTATATCATCAATGCTGTGATTCCTTTGATGATVATCCAAAGCAGTATTTGATCTTCAAGGTCGATAAGCTTTGA  
**BjSultr1; 2c** 1292 ACACACCAAAACGCCATCCITCGCAGCTATTATATCATCAATGCTGTGATTCCTTTGATGATVATCCAAAGCAGTATTTGATCTTCAAGGTCGATAAGCTTTGA  
  
**BjSultr1; 2a** 1401 CTTTCATCGCTTGTATGGGAGCTTTCTTTTGGCGTCACTCTTTTCCGTTGAGATCGGACTTCTTATTTGTCCTCTCTATATCGTTTGGCTTAAGATTCCTCTTG  
**BjSultr1; 2b** 1392 TTTTCGTTGCTGTATGGGAGCTTTCTTTTGGCGTCACTCTTTTCCGTTGAGATGGGCTTCTCATTTGCCGTTCTATATCATTTGCAAGATTCCTCTTG  
**BjSultr1; 2c** 1392 CTTTCGTTGCTTGTATGGGAGCTTTCTTTTGGCGTCACTCTTTTCCGTTGAGATGGGCTTCTCATTTGCCGTTCTATATCATTTGCTTAAGATTCCTCTTG  
  
**BjSultr1; 2a** 1501 CAAAGTAAACAAGACTAGAACCCGAGTTCTTTGGAAACATCCCAAACCTTCAGTATATCCGGAAACATCCAACAGTATCCTGAAGCCACCATGTTCCAGGGG  
**BjSultr1; 2b** 1492 CAAAGTAAACAAGACTAGAACCCGAGTTCTTTGGAAACATCCCAAACCTTCAGTATATAGAAACATCCAACAGTATCCTGAAGCCACCATGTTCCAGGGG  
**BjSultr1; 2c** 1492 CAAAGTAAACAAGACTAGAACCCGAGTTCTTTGGAAACATCCCAAACCTTCAGTATATAGAAACATCCAACAGTATCCTGAAGCCACCATGTTCCAGGGG  
  
**BjSultr1; 2a** 1601 TTCCTAACCTCGTGTGACTCGCGGATTTACTTCTCCAACTCAAATACGTCAGAGAAAGGATCCAAAGATGGTTACTAGAGGAAGAAAGAGAAAGGTTGAA  
**BjSultr1; 2b** 1592 TTCCTAACCTCGTGTGACTCGCGGATTTACTTCTCCAACTCAAATACGTCAGAGAAAGGATCCAAAGATGGTTACTAGAGGAAGAAAGAGAAAGTGA  
**BjSultr1; 2c** 1592 TTCCTAACCTCGTGTGACTCGCGGATTTACTTCTCCAACTCAAATACGTCAGAGAAAGGATCCAAAGATGGTTACTAGAGGAAGAAAGAGAAAGGTTGAA  
  
**BjSultr1; 2a** 1701 AGCAGCAAGCCTACCTAGGATCCAGTTTCTGATCATGAAATGTCACCTGTTACGGACATCGACACAAGTGGTATTCACGCCCTAGAAAGCTTATACAAA  
**BjSultr1; 2b** 1692 AGCAGCAAGCCTACCTAGGATCCAGTTTCTGAAATGTCACCTGTTACGGACATCGATACAAGTGGTATCCACGCCCTAGAAAGCTTATATAAG  
**BjSultr1; 2c** 1692 AGCAGCAAGCCTACCTAGGATCCAGTTTCTGAAATGTCACCTGTTACGGACATCGATACAAGTGGTATCCACGCCCTAGAAAGCTTATACAAA  
  
**BjSultr1; 2a** 1801 TCTCTCCAGAAAAGAGATATTCAGTTGGTTCTTCCGAAACCTTGGACCGTTGGTGAATGGCAAGCTACATTTGTTCGCACITTTGCTGACATGCTAGGACACG  
**BjSultr1; 2b** 1792 TCTCTACAGAAAGAGATATTCAGTTGGTTCTTCCGAAACCTTGGTAAATGGCAAGCTACATTTGTTCGCACITTTGCTGATATGTTAGGACACG  
**BjSultr1; 2c** 1792 TCTCTCCAGAAAGAGATATTCAGTTGGTTCTTCCGAAACCTTGGTAAATGGTGAATGGCAAGCTTACACTTGTCTCACITTTGCTGACATGTTGGATATG  
  
**BjSultr1; 2a** 1901 ACCATATCTTTCTGACGGTGGCTGATGCCCTGGAAAGCTTGGTGTCCAAAACCTCTCCGACGAGGTTCTGA 1968  
**BjSultr1; 2b** 1892 ACAATATATTTCTGACGGTGGCTGATGCCCTGGAAATCTTGTGTCCAAAACCTCTCCGACGAGGTTCTGA 1959  
**BjSultr1; 2c** 1892 ACCATATCTTTCTGACGGTGGCTGATGCCCTGGAAAGCTTGGTGTCCAAAACCTCTCCGACGAGGTTCTGA 1959
