# Supplementary material for: Cadmium exposure and sulfate limitation reveal differences in the transcriptional control of three sulfate transporter (Sultr1;2) genes in Brassica juncea
Source: PubMed Central journal article supplement (PMC4049391; doi:10.1186/1471-2229-14-132), 2014-05-16

**Additional file 9 Changes in the transcript relative amount of the three *BjSultr1;2* forms in the roots of *Brassica juncea* grown under Cd exposure or sulfate limitation.** Plants were exposed to 25  $\mu\text{M}$   $\text{Cd}^{2+}$  for 48 h (+Cd) or grown under 10  $\mu\text{M}$   $\text{SO}_4^{2-}$  for 10 days (-S). Control plants were grown under 200  $\mu\text{M}$   $\text{SO}_4^{2-}$  and were not exposed to cadmium. The entire ORFs of the three *BjSultr1;2* forms were amplified and PCR products were digested with *Cla*I endonuclease, electrophoresed on agarose gel, and finally stained with SYBR Green I. Signals were detected using a laser scanner with 532 nm laser and 526 nm filter and densitometrically analyzed using ImageJ 1.46 software. cDNA loading was normalized using *BjTub* as an internal control. Bars and error bars are means and SE of three independent experiments run in triplicate ( $n = 9$ ). Asterisks indicate significant differences between control and treated plants ( $P \leq 0.001$ ).

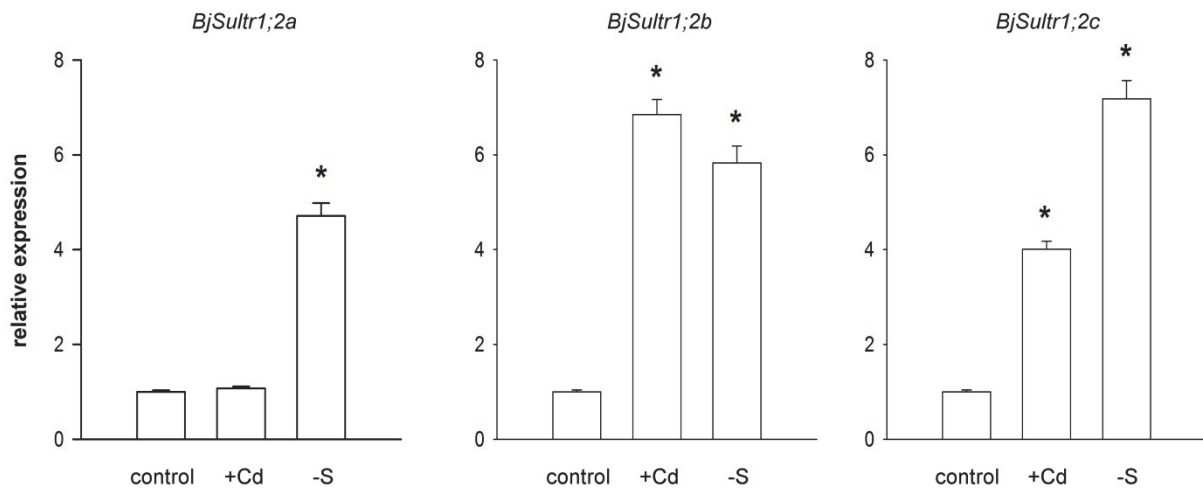

Supplement: 1471-2229-14-132-S9.pdf [file 1471-2229-14-132-S9.pdf]
