# Supplementary material for: Cadmium exposure and sulfate limitation reveal differences in the transcriptional control of three sulfate transporter (Sultr1;2) genes in Brassica juncea
Source: PubMed Central journal article supplement (PMC4049391; doi:10.1186/1471-2229-14-132), 2014-05-16

**Additional file 11 Relationship between NPT content and sulfate uptake capacity in plant of *Brassica juncea* exposed to different Cd concentrations.** Plants were exposed for 48 h to different Cd<sup>2+</sup> concentrations: 0 (white), 10 (grey), and 25 (black) μM. Circles, roots; triangles, shoots. Data points and error bars are means and SE of three experiments run in triplicate ( $n = 9$ ).

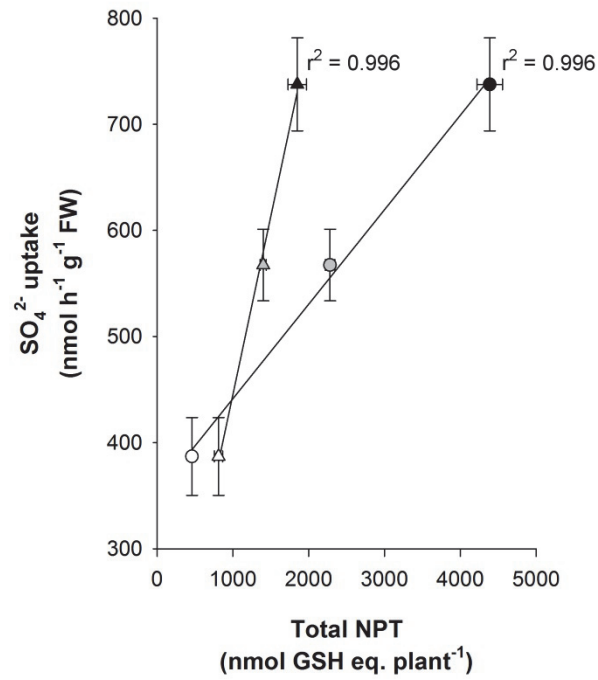

Supplement: 1471-2229-14-132-S11.pdf [file 1471-2229-14-132-S11.pdf]
